# Supplementary material for: Salutogenic health promotion program for migrant women at risk of social exclusion
Source: Int J Equity Health. 2019 Sep 3;18:139. doi: 10.1186/s12939-019-1032-0 (PMC6724247; doi:10.1186/s12939-019-1032-0)
Supplement: Supplementary file 2 — Variations of SOC, social support, self-esteem, perceived stress and quality of life by socio-demographic data. (XLSX 15 kb) [file 12939_2019_1032_MOESM2_ESM.xlsx]

## Sheet: Sheet2
	Additional file 2: Variations of SOC, social support, self-esteem, perceived stress and quality of life by socio-demographic data
		∆ SOC	p	∆ Social Support	p	∆ Self-esteem	p	∆ Perceived stress	p	∆ Physical QL	p	∆ Mental QL	p
	Age
	18-35 year old	-1.64 (12.07)	0.648	-1.63 (7.23)	0.215	1.36 (5.73)	0.742	-2.91 (3.93)	0.481	7.06 (3.45)	0.000	-5.54 (8.07)	0.013
	> 35 year old	0.46 (10.98)		1.87 (6.70)		2.13 (5.89)		-1.66 (4.65)		-0.87 (5.47)		2.87 (7.81)
	Country/region of birth
	Morocco	-4.20 (9.55)	0.416	0.80 (5.67)	0.883	-1.50 (4.79)	0.020	-1.50 (5.27)	0.372	3.33 (5.11)	0.436	-2.58 (6.96)	0.649
	Sub-Saharan Africa	1.70 (13.32)		-0.50 (6.55)		2.40 (4.88)		-3.70 (3.20)		3.37 (6.45)		-0.21 (11.09)
	Países centro o sudamericanos	2.33 (10.21)		1.17 (10.38)		6.33 (5.68)		-0.83 (4.17)		-0.41 (7.24)		1.69 (8.25)
	Rural/urban origin
	Rural	-2.00 (11.86)	0.768	1.50 (3.32)	0.737	5.25 (3.30)	0.197	-2.75 (3.10)	0.786	4.78 (5.86)	0.426	-6.30 (9.01)	0.173
	Urban	-0.14 (11.42)		0.18 (7.52)		1.18 (5.89)		-2.09 (4.56)		2.06 (6.21)		0.34 (8.63)
	Marital status
	Single/separated/divorced	-3.5 (13.07)	0.364	2.75 (9.78)	0.26	3.00 (6.55)	0.490	-0.25 (5.31)	0.129	-0.12 (7.61)	0.232	1.35 (7.48)	0.447
	Married	0.94 (10.48)		-0.67 (5.39)		1.28 (5.43)		-3.06 (3.65)		3.64 (5.17)		-1.59 (9.44)
	Dependant family members
	No	-8.00 (0.00)	0.504	13.00 (0.00)	0.065	-3.00 (0.00)	0.402	7.00 (0.00)	0.027	7.21 (0.00)	0.442	3.49 (0.00)	0.640
	Yes	-0.12 (11.39)		-0.12 (6.65)		2.00 (5.76)		-2.56 (3.98)		2.29 (6.17)		-0.85 (8.98)
	Number of children
	0 children	-12.50 (6.36)	0.238	6.00 (9.90)	0.351	0.00 (4.24)	0.650	0.00 (9.90)	0.551	6.42 (1.11)	0.639	-7.20 (15.12)	0.262
	1 and 2 children	2.55 (9.04)		1.55 (5.27)		3.22 (6.24)		-3.33 (4.55)		2.54 (6.64)		-3.06 (9.33)
	3 or more children	-0.60 (12.27)		-1.07 (7.56)		1.20 (5.72)		-1.80 (3.59)		1.92 (6.26)		1.61 (7.64)
	Current cohabitation status
	With family or relatives	-1.09 (11.03)	0.490	-0.95 (6.25)	0.019	0.95 (5.22)	0.074	-2.36 (4.18)	0.645	3.49 (5.55)	0.046	-1.17 (9.01)	0.517
	Without family nor relatives	3.25 (13.60)		7.75 (7.09)		6.50 (6.85)		-1.25 (5.68)		-3.08 (6.90)		2.02 (8.50)
	Daily proportion of time dedicated to family
	None to quite a lot (0-5)	0.46 (12.30)	0.697	1.38 (7.00)	0.478	2.38 (6.28)	0.617	-2.07 (4.37)	0.895	2.18 (6.48)	0.807	-3.17 (8.92)	0.156
	Much time to all my time (5-10)	-1.30 (10.57)		-0.62 (7.14)		1.23 (5.29)		-2.31 (4.46)		2.78 (5.99)		1.80 (8.37)
	Years outside the country of birth
	0- 10 years	-0.33 (12.18)	0.971	0.25 (8.02)	0.93	1.92 (4.74)	0.931	-2.66 (5.42)	0.629	3.18 (6.41)	0.602	-3.91 (8.67)	0.084
	> 10 years	-0.50 (10.89)		0.50 (6.32)		1.71 (6.63)		-1.79 (3.29)		1.88 (6.04)		2.09 (8.31)
	Residency Background
	Migred directly to Spain	0.13 (11.62)	0.499	0.39 (7.41)	0.99	1.43 (5.54)	0.368	-2.13 (4.60)	0.603	3.03 (6.13)	0.213	-0.94 (9.35)	0.681
	Migred to other countries	-4.67 (8.33)		0.33 (3.21)		4.66 (7.50)		-2.66 (0.58)		-1.72 (5.07)		1.35 (3.06)
	Current employment status
	Paid work outside the home	1.70 (11.81)	0.079	-0.85 (4.57)	0.324	2.30 (5.22)	0.434	-2.55 (4.02)	0.453	1.99 (6.22)	0.468	-0.69 (9.28)	0.994
	Unemployment	-7.50 (5.13)		4.50 (11.83)		0.17 (7.47)		-1.00 (5.48)		4.11 (6.02)		-0.65 (8.00)
	Socioeconomic status Perception
	Good	0.40 (9.59)	0.775	-2.00 (3.59)	0.114	0.80 (5.88)	0.489	-2.30 (3.68)	0.922	1.40 (6.25)	0.488	-0.50 (9.09)	0.935
	Bad or very bad	-0.94 (12.47)		1.87 (8.24)		2.44 (5.71)		-2.12 (4.80)		3.16 (6.15)		-0.80 (8.99)
	Years of schooling
	< 7 years	-5.17 (16.01)	0.516	0.00 (6.63)	0.949	1.17 (5.23)	0.953	-5.00 (2.90)	0.191	0.87 (4.81)	0.361	2.05 (12.52)	0.598
	7-11 years	1.23 (9.98)		0.85 (7.67)		1.92 (4.42)		-1.54 (4.35)		4.23 (6.59)		-0.65 (7.02)
	> 11 years	0.57 (9.31)		-0.14 (7.03)		2.14 (8.59)		-1.00 (4.76)		0.62 (6.07)		-3.09 (9.09)
	Importance of spirituality
	Low (0-7)	-2.75 (3.77)	0.403	1.25 (12.63)	0.794	5.50 (4.20)	0.165	-1.75 (2.75)	0.829	3.25 (5.58)	0.79	2.90 (7.76)	0.389
	High (>7)	0.00 (12.16)		0.23 (5.96)		1.14 (5.77)		-2.27 (4.60)		2.34 (6.33)		-1.33 (9.04)
	NOTE: The quantitative variables are shown by their mean with the standar deviation in parentheses.
