# Supplementary material for: Salutogenic health promotion program for migrant women at risk of social exclusion
Source: Int J Equity Health. 2019 Sep 3;18:139. doi: 10.1186/s12939-019-1032-0 (PMC6724247; doi:10.1186/s12939-019-1032-0)
Supplement: Supplementary file 4 — Models of the variation of SOC, social support, self-esteem, stress, physical quality of life and mental quality of life according to criteria of variables selection (n = 26). (XLSX 15 kb) [file 12939_2019_1032_MOESM4_ESM.xlsx]

## Sheet: DEF (2)
	Additional file 4: Models of the variation of SOC, social support, self-esteem, stress, physical quality of life and mental quality of life according to criteria of variables selection (n=26)
			Model 1				Model 2
	Dependent variable	Independent variable	B	SE	CI 95%	P	B	SE	CI 95%	P
	∆ SOC	SOC (initial)	-0.935	0.221	-1.399 - -0.471	0.000	-0.902	0.175	-1.264 - -0.540	0.000
		Social Support (initial)	0.661	0.302	0.027 - 1.295	0.042	0.705	0.251	0.185 - 1.225	0.010
		Age	0.421	4.153	-8.304 - 9.146	0.920
		Perceived socioeconomic status	1.838	4.376	-11.032 -7.355	0.679
		Perceived Stress (initial)	-0.049	0.580	-1.266 - 1.169	0.934
		Self-esteem (initial)	0.392	0.425	-0.501 - 1.286	0.368
		Mental QL (initial)	0.077	0.317	-0.590 - 0.744	0.811
		R2		0.644				0.611
		F for change in R2		0.505				0.578
	Dependent variable	Independent variable	B	SE	CI 95%	P	B	SE	CI 95%	P
	∆ Social Support	Social Support (initial)	-0.763	0.166	-1.110 - -0.417	0.000	-0.732	0.163	-1.069 - -0.395	0.000
		Current cohabitation status	8087	3.000	1.807 - 14.366	0.014	7.890	2.586	2.541 - 13.238	0.006
		Perceived Stress (initial)	0.481	0.325	-0.198 - 1.161	0.155
		Self-esteem (initial)	0.065	0.255	-0.469 - 0.600	0.800
		Physical QL (initial)	0.051	0.231	-0.433 - 0.534	0.828
		Mental QL (initial)	0.193	0.179	-0.182 - 0.568	0.294
		R2		0.653				0.578
		F for change in R2		0.544				0.542
	Dependent variable	Independent variable	B	SE	CI 95%	P	B	SE	CI 95%	P
	∆ Self-esteem	Self-esteem (initial)	-0.687	0.202	-1.092 - -0.297	0.002	-0.794	0.186	-1.180 - -0.409	0.000
		Social Support (initial)	0.239	0.129	-0.031 - 0.508	0.080	0.277	0.133	0.001 - 0.553	0.049
		Mental QL (initial)	0.314	0.151	0.000 - 0.629	0.050	0.281	0.136	-2.33 - 0.563	0.049
		Country/region of birth	1.261	1.119	-1.073 - 3.594	0.273
		SOC (initial)	-0.118	0.101	-0.329 - 0.093	0.258
		R2		0.667				0.604
		F for change in R2		0.584				0.549
	Dependent variable	Independent variable	B	SE	CI 95%	P	B	SE	CI 95%	P
	∆ Perceived Stress	Perceived Stress (initial)	-0.765	0.256	-1.306 - -0.225	0.008	-0.686	0.214	-1.130 - -0.242	0.004
		Mental QL (initial)	-0.260	0.127	-0.529 - 0.008	0.057	-0.256	0.111	-0.485 - -0.026	0.031
		Social Support (initial)	-0.204	0.130	-0.478 - 0.070	0.134	-0.231	0.111	-0.462 - 0.000	0.049
		Employment status	-0.328	0.653	-1.707 - 1.051	0.622
		Dedication to the family	-0.929	1.514	-4.122 - 2.265	2.265
		Self-esteem (initial)	-0.055	0.178	-0.430 - 0.320	0.760
		Perceived socioeconomic status	1.753	1.706	-1.847 - 5.352	0.319
		Dependant family members	-2-966	4.178	-11.780 - 5.848	0.487
		R2		0.511				0.511
		F for change in R2		0.445				0.445
	Dependent variable	Independent variable	B	SE	CI 95%	P	B	SE	CI 95%	P
	∆ Physical QL	Physical QL (initial)	-0.383	0.290	-1.001 - 0.236	0.236	-0.503	0.199	-0.916 - -0.091	0.019
		Age	-7.905	3.304	-14.948 - -0.862	0.030	-6.539	1.787	-10.236 - -2.843	0.001
		Current cohabitation status	-2.139	3.635	-9.887 - 5.608	0.565
		Employment status	0.698	1.091	-1.627 - 3.022	0.532
		Perceived socioeconomic status	-2.403	3.377	-9.601 - 4.795	0.488
		Years of schooling	-0.353	1.690	-3.955 - 3.249	0.837
		Perceived Stress (initial)	-0.151	0.382	-0.966 – 0.664	0.698
		Self-esteem (initial)	-0.018	0.277	-0.609 - 0.573	0.949
		SOC (initial)	-0.104	0.174	-0.475 -0.267	0.560
		Social Support (initial)	-0.137	0.194	-0.551 - 0.276	0.490
		R2		0.611				0.550
		F for change in R2		0.352				0.511
	Dependent variable	Independent variable	B	SE	CI 95%	P	B	SE	CI 95%	P
	∆ Mental QL	Mental QL (initial)	-0.996	0.274	-1.579 - -0.413	0.002	-0.947	0.219	-1.402 - -0.492	0.000
		Age	6577	2.874	0.451 - 12.704	0.037	5.721	2.441	0.659 - 10.782	0.029
		Country/region of birth	4.841	1.948	0.690 - 8.992	0.025	4.631	1.579	1.356 - 7.905	0.008
		Current employment status	-0.967	1.224	-3.575 - 1.642	0.442
		Perceived socioeconomic status	3.388	3.699	-4.496 - 11.272	0.374
		Years of schooling	-2.018	1.818	-5.894 - 1.857	0.284
		Years outside their country of birth	4.040	2.405	-1.086 - 9.165	0.114
		Self-esteem (initial)	0.192	0.327	-0.506 - 0.890	0.566
		SOC (initial)	0.236	0.194	-0.178 - 0.650	0.650
		Perceived Stress (initial)	-0.423	0.454	-1.390 -0.543	0.365
		R2		0.749				0.611
		F for change in R2		0.581				0.558
	NOTE: B: B coefficient; SE: standar error; CI 95%: confidence interval of 95%; p probability level; R2: R-Squared,the coefficient of determination
	Model 1 includes all independent variables
	Model 2 or final model expose those variables that have shown a statistically significant relationship between the variation of each construct after the Health Promotion Program
